# Supplementary material for: Using FFPE RNA-Seq with 12 marker genes to evaluate genotoxic and non-genotoxic rat hepatocarcinogens
Source: Genes Environ. 2020 Mar 30;42:15. doi: 10.1186/s41021-020-00152-4 (PMC7104499; doi:10.1186/s41021-020-00152-4)
Supplement: Supplementary file 1 — Additional file 1:Appendix 1. Raw read number from 15 samples analyzed by MiniSeq. [file 41021_2020_152_MOESM1_ESM.xlsx]

## Sheet: Appendix 1
Appendix 1 Raw read number from 15 samples analyzed by MiniSeq
Sample	Aen	Bax	Btg2	Ccnf	Ccng1	Cdkn1a	Dazap2	Gdf15	Lrp1	Mbd1	Phlda3	Plk2	Tubb4b	Ube2d3
Cont-1	3965	6408	4989	4932	6126	4134	9192	374	40556	422	9160	2540	23805	5491
Cont-2	2046	1225	2791	3049	209	886	6279	172	23779	1	4762	2405	3370	39
Cont-3	4302	3931	3516	883	5061	309	10348	184	47968	745	11222	2468	9296	4127
Cont-4	3633	4094	6250	506	5369	1578	10154	1	36348	1	8202	1747	13026	2387
Cont-5	11486	13490	7720	3790	18944	1871	23357	1410	81314	271	18882	5870	52297	9994
AAF-1	66058	64167	60790	1729	131131	2668	26928	3726	31039	3239	131843	11769	68958	13522
AAF-2	22956	19998	23767	1393	31947	1573	10765	1703	22780	1028	39171	2432	18197	5572
AAF-3	58250	47897	43725	4354	113177	10309	22802	4860	88465	3499	114424	8244	122478	9044
AAF-4	9095	12521	11023	1389	27738	1939	4370	675	20935	571	20137	1341	23449	1817
AAF-5	7276	8128	54517	51	16213	1542	3432	889	14251	754	14299	1906	13022	1565
CRE-1	10301	12841	7625	1012	14084	749	23269	960	48369	1329	17277	4198	19427	3725
CRE-2	3223	5820	3468	1035	9089	34	7998	721	36685	1	7612	1492	19548	7021
CRE-3	2758	3754	2360	188	1575	1095	7400	1094	26885	1	4082	1622	25053	3024
CRE-4	1351	5885	3560	2265	8987	1	8248	768	42191	933	4902	1195	13405	2435
CRE-5	6686	9466	5045	1074	13771	266	18961	1360	43571	226	10309	2483	18649	8356
