# Supplementary material for: Using FFPE RNA-Seq with 12 marker genes to evaluate genotoxic and non-genotoxic rat hepatocarcinogens
Source: Genes Environ. 2020 Mar 30;42:15. doi: 10.1186/s41021-020-00152-4 (PMC7104499; doi:10.1186/s41021-020-00152-4)
Supplement: Supplementary file 2 — Additional file 2: Appendix 2. Log2 transferred data. [file 41021_2020_152_MOESM2_ESM.xlsx]

## Sheet: Appendix 2
Appendix 2 Log2 transferred data
Sample	Aen	Bax	Btg2	Ccnf	Ccng1	Cdkn1a	Dazap2	Gdf15	Lrp1	Mbd1	Phlda3	Plk2	Tubb4b	Ube2d3
Cont-1	11.9531	12.6457	12.2845	12.268	12.5807	12.0133	13.1662	8.54689	15.3076	8.7211	13.1611	11.3106	14.539	12.4229
Cont-2	10.9986	10.2586	11.4466	11.5741	7.70736	9.79116	12.6163	7.42626	14.5374	0	12.2174	11.2318	11.7185	5.2854
Cont-3	12.0708	11.9407	11.7797	9.78627	12.3052	8.27146	13.3371	7.52356	15.5498	9.5411	13.454	11.2691	13.1824	12.0109
Cont-4	11.8269	11.9993	12.6096	8.98299	12.3904	10.6239	13.3098	0	15.1496	0	13.0018	10.7707	13.6691	11.221
Cont-5	13.4876	13.7196	12.9144	11.888	14.2095	10.8696	14.5116	10.4615	16.3112	8.08215	14.2047	12.5191	15.6744	13.2868
AAF-1	16.0114	15.9695	15.8915	10.7557	17.0006	11.3815	14.7168	11.8634	14.9218	11.6613	17.0085	13.5227	16.0734	13.723
AAF-2	14.4866	14.2876	14.5367	10.444	14.9634	10.6193	13.3941	10.7339	14.4755	10.0056	15.2575	11.2479	14.1514	12.444
AAF-3	15.83	15.5476	15.4162	12.0881	16.7882	13.3316	14.4769	12.2467	16.4328	11.7727	16.804	13.0091	16.9022	13.1427
AAF-4	13.1509	13.6121	13.4282	10.4398	14.7596	10.9211	12.0934	9.39874	14.3536	9.15735	14.2976	10.3891	14.5172	10.8273
AAF-5	12.8289	12.9887	15.7344	5.67243	13.9849	10.5906	11.7448	9.79604	13.7988	9.55842	13.8036	10.8963	13.6687	10.6119
CRE-1	13.3305	13.6485	12.8965	9.98299	13.7818	9.54882	14.5061	9.90689	15.5618	10.3761	14.0766	12.0355	14.2458	11.863
CRE-2	11.6542	12.5068	11.7599	10.0154	13.1499	5.08746	12.9654	9.49386	15.1629	0	12.8941	10.543	14.2547	12.7775
CRE-3	11.4294	11.8742	11.2046	7.55459	10.6211	10.0967	12.8533	10.0954	14.7145	0	11.9951	10.6636	14.6127	11.5622
CRE-4	10.3998	12.5228	11.7977	11.1453	13.1336	0	13.0098	9.58496	15.3646	9.86573	12.2592	10.2228	13.7105	11.2497
CRE-5	12.7069	13.2085	12.3006	10.0688	13.7493	8.05528	14.2107	10.4094	15.4111	7.82018	13.3316	11.2779	14.1868	13.0286
