# Supplementary material for: Using FFPE RNA-Seq with 12 marker genes to evaluate genotoxic and non-genotoxic rat hepatocarcinogens
Source: Genes Environ. 2020 Mar 30;42:15. doi: 10.1186/s41021-020-00152-4 (PMC7104499; doi:10.1186/s41021-020-00152-4)
Supplement: Supplementary file 4 — Additional file 4: Appendix 4. Ratio (exp/cont) log2. Open TG-GATEs (DNA microarry) and FFPE-RNA-Seq. [file 41021_2020_152_MOESM4_ESM.xlsx]

## Sheet: Appendix 4
	Appendix 4		Ratio (exp/cont) log2. Open TG-GATEs (DNA microarry) and FFPE-RNA-Seq
										Genes (the logarithmic log2 of exp/cont)
No.	Group	Subgroup	time	Chemicals	Aen	Bax	Btg2	Ccnf	Ccng1	Cdkn1a	Gdf15	Lrp1	Mbd1	Phlda3	Plk2	Tubb4b
1	Open	GTHC	24h 1	AAF24hL	2.46	2.66	2.01	-0.67	3.27	2.09	2	-0.27	0.18	2.76	1.67	1.12
2	TG-GATEs			AAF24hM	2.48	2.54	1.95	-0.9	3.18	2.7	2.27	-0.11	-0.78	2.58	1.8	1.02
3	[14]			AAF24hH	2.58	2.41	1.51	-0.78	3.02	2.09	2.41	-0.18	0.41	2.63	1.73	0.81
4			24h 2	AFL24hL	1.34	1.74	0.86	-0.21	2.33	2.34	1.53	-0.22	0.05	1.41	0.86	-0.05
5				AFL24hM	2.15	2.36	2.24	-0.22	3.18	2.74	3.18	-0.45	0.2	2.13	1.16	0.25
6				AFL24hH	2.85	2.84	3.33	-0.42	3.71	3.77	4.23	-0.47	0.98	2.53	1.59	0.86
7			24h 3	DEN24hL	0.65	0.25	0.585	-0.38	1.21	2.525	0.72	0.09	-0.14	0.9	0.57	-0.05
8				DEN24hM	1.48	1.32	1.42	-0.48	2.87	3.48	1.46	-0.16	-0.07	1.94	0.93	0.43
9				DEN24hH	2.77	2.29	3.39	-0.15	3.94	4.94	2.75	-0.59	0.47	3.01	1.83	1.74
10			24h 4	2NF24hL	2.52	1.71	1.4	-0.44	2.72	3.07	1.31	-0.549	0.923	2.41	0.84	0.893
11				2NF24hM	3.33	1.9	1.88	-0.727	3.11	3.73	1.99	-0.542	1.28	2.96	1.45	1.02
12				2NF24hH	3.04	1.46	1.12	-0.898	2.84	2.21	1.55	-0.843	0.951	2.37	1.29	0.824
13			24h 5	NNM24hL	2.48	2.09	3.43	-0.34	3.33	3.72	3.25	-0.93	0.31	2.03	0.99	0.69
14				NNM24hM	3.16	2.73	3.98	-0.31	4.14	4.33	3.92	-1.61	1	2.75	1.84	1.17
15				NNM24hH	3.15	2.76	4.12	-0.4	4.37	4.35	4.53	-1.66	1.24	3.13	2.23	1.37
16		NGTHC	24h 1	CLO24hL	-0.01	0.15	0.075	0.6	0.09	0.34	0.6	0.03	0.05	0.44	0.16	0.26
17				CLO24hM	-0.09	0.19	-0.1	0.7	0.15	0.61	0.26	0.16	0.22	0.35	0.38	0.47
18				CLO24hH	0.025	0.22	-0.035	1.24	0.67	0.71	0.08	0.08	0.11	0.64	0.32	0.96
19			24h 2	ETH24hL	-0.00564	0.0149	-0.193	-0.172	-0.0229	0.317	-0.63	-0.0958	-0.0331	0.189	-0.359	-0.12
20				ETH24hM	-0.15	0.139	-0.161	-0.17	-0.145	0.228	-0.743	0.105	-0.0252	0.285	0.0781	0.0348
21				ETH24hH	0.228	0.00602	-0.271	-0.439	-0.215	-0.215	0.364	-0.378	0.167	-0.0974	-0.303	0.0219
22			24h 3	FEN24hL	-0.53	0.386	0.538	0.149	0.025	-0.122	0.515	0.0766	0.0191	0.573	0.0513	0.342
23				FEN24hM	-0.108	0.631	0.206	0.709	0.652	-0.0128	0.859	-0.106	0.0236	1.08	0.0757	0.752
24				FEN24hH	0.0764	0.86	0.0245	1.16	1.06	0.189	0.512	0.206	-0.00933	1.1	0.564	0.94
25			24h 4	GEM24hL	0.15	0.396	-0.124	-0.0745	0.375	0.466	0.477	-0.315	-0.281	0.166	0.305	0.349
26				GEM24hM	-0.189	0.292	-0.0686	0.0686	0.267	0.395	-0.61	0.136	-0.217	0.0902	-0.0295	0.39
27				GEM24hH	-0.383	0.563	-0.165	0.567	0.593	-0.156	0.114	0.272	-0.395	-0.153	-0.0357	0.764
28			24h 5	HEX24hL	0.39	-0.16	-0.191	0.0175	0.0264	-0.162	1.48	0.758	-0.0331	0.314	-0.0788	0.415
29				HEX24hM	0.602	-0.196	-0.411	0.227	0.234	-0.0139	1.35	0.305	0.0372	0.501	0.186	0.504
30				HEX24hH	0.902	-0.173	-0.334	0.319	0.0684	-0.434	0.131	0.562	0.00929	0.515	0.247	0.618
31			24h 6	PHE24hL	-0.31	0.31	-0.02	0.34	-0.06	-0.345	0.87	-0.1	-0.16	1.03	0.35	0.85
32				PHE24hM	0.265	0.28	-0.535	0.06	0.16	-0.655	0.46	-0.02	-0.15	1	0.38	0.74
33				PHE24hH	0.77	0.15	-0.005	-0.27	-0.52	-2.02	1.23	0.09	-0.24	0.65	0.66	0.19
34			24h 7	WY24hL	-0.207	0.658	-0.0433	0.567	0.102	-0.27	-0.138	0.0507	0.111	-0.138	-0.0173	0.758
35				WY24hM	0.0329	0.623	0.117	0.782	0.608	0.345	-0.485	0.0329	-0.0152	0.622	-0.0279	0.914
36				WY24hH	0.408	0.409	-0.137	0.569	0.769	0.0461	-0.185	-0.017	0.203	0.218	0.0119	0.819
37		NGTNHC	24h 1	AA24hL	0.0727	-0.183	-0.0749	-0.00055	0.389	-0.164	-0.377	0.142	0.101	0.174	0.0729	-0.122
38				AA24hM	-0.576	-0.188	-0.349	0.163	0.263	0.641	-0.457	0.239	0.282	0.0528	-0.00845	-0.121
39				AA24hH	0.132	0.0749	0.17	0.25	0.0135	0.301	-0.0356	0.2	-0.00377	-0.116	-0.191	-0.0426
40			24h 2	ASP24hL	0.371	-0.0523	-0.231	-0.876	-0.0883	-0.0167	-0.348	0.104	0.0958	-0.532	0.0464	-0.0677
41				ASP24hM	0.652	-0.378	0.263	-0.649	-0.233	-0.77	-1.06	0.235	-0.514	-0.263	-0.31	-0.323
42				ASP24hH	0.5	-0.357	0.422	-0.719	-0.0829	0.109	0.396	0.0955	0.242	-0.774	-0.0131	-0.521
43			24h 3	CAF24hL	0.0525	0.0221	-0.381	-0.00538	-0.221	-0.186	0.449	0.182	-0.174	-0.124	-0.335	-0.0244
44				CAF24hM	0.258	0.0476	-0.523	0.15	-0.106	0.289	-0.0777	0.226	-0.278	-0.108	-0.0391	-0.0971
45				CAF24hH	-0.0314	-0.119	-0.477	-0.451	-0.389	0.296	0.464	0.0759	-0.104	-0.709	0.235	-0.461
46			24h 4	CPA24hL	-0.163	0.0848	0.0319	-0.0326	0.303	0.19	-0.538	-0.0838	0.135	0.37	-0.0406	0.0583
47				CPA24hM	-0.302	-0.0662	0.0615	-0.142	-0.0216	0.0821	0.159	0.042	0.0333	-0.59	-0.273	-0.226
48				CPA24hH	-0.203	-0.113	-0.131	-0.818	0.0373	-0.0932	0.235	-0.0335	0.0337	-0.271	-0.177	-0.55
49			24h 5	CPP24hL	0.14	-0.045	-0.148	0.0111	-0.122	0.259	-0.0237	0.206	0.135	0.725	0.0245	-0.0712
50				CPP24hM	-0.366	-0.22	-0.0264	-0.629	-0.0173	-0.4	0.244	0.116	-0.213	0.0384	0.238	-0.27
51				CPP24hH	-0.0853	-0.184	-0.101	-0.873	-0.0843	-0.451	-0.771	-0.0622	-0.443	-0.183	-0.341	-0.667
52			24h 6	DEX24hL	0.0437	-0.368	-0.154	-0.44	-0.184	-0.245	-0.571	0.136	-0.026	-0.0347	-0.174	0.196
53				DEX24hM	0.338	-0.387	-0.295	-0.213	0.0297	-0.478	-1.3	0.0628	-0.0195	-0.59	-0.288	0.396
54				DEX24hH	-0.17	-0.627	-0.276	-0.73	0.473	0.479	-0.802	-0.0906	-0.272	-1.24	-0.704	0.79
55			24h 7	DIA24hL	0.153	-0.0347	-0.123	0.124	0.245	-0.482	0.806	0.0261	0.231	0.392	0.0992	-0.0742
56				DIA24hM	-0.0126	-0.0737	-0.112	0.224	0.318	-0.112	0.995	-0.173	-0.285	0.57	0.329	0.11
57				DIA24hH	0.294	0.0822	-0.597	0.527	0.295	-0.55	0.753	-0.0965	0.142	0.691	0.322	0.274
58			24h 8	IND24hL	-0.267	-0.0281	-0.317	0.0191	0.0127	-0.337	-0.376	0.00247	-0.376	-0.114	0.344	-0.299
59				IND24hM	0.849	0.351	1.06	0.136	1.04	-0.371	-1.41	-0.136	0.601	-1.5	-0.881	-0.342
60				IND24hH	1.32	0.613	1.72	-0.16	0.928	-0.542	-1.25	0.0256	0.652	-1.19	-0.893	0.077
61			24h 9	PBZ24hL	0.251	-0.305	0.11	0.243	0.0832	0.0289	0.897	-0.0989	0.0287	-0.183	0.0666	0.209
62				PBZ24hM	-0.142	0.0719	-0.146	0.502	0.055	0.167	0.0981	-0.0106	0.365	-0.235	0.246	0.496
63				PBZ24hH	0.393	-0.226	-0.199	0.0148	0.202	-0.341	0.936	0.208	0.107	-0.248	-0.278	0.48
64			24h 10	THE24hL	-0.153	0.0481	-0.171	0.659	0.191	-0.228	-0.38	-0.096	-0.142	-0.0399	0.304	0.202
65				THE24hM	0.109	0.169	-0.13	0.053	0.195	0.42	-0.904	0.0139	-0.492	-0.763	0.134	0.136
66				THE24hH	0.12	-0.233	-0.569	-0.541	0.299	-1.5	-0.342	0.382	-0.24	-0.267	0.604	0.195
67			24h 11	TOL24hL	0.135	-0.254	-0.24	-0.247	0.0314	-0.339	-0.31	-0.0504	-0.152	-0.103	-0.104	-0.16
68				TOL24hM	0.0956	-0.126	0.0778	-0.409	0.0927	-0.472	-0.0534	0.00334	0.00378	0.131	-0.297	-0.1
69				TOL24hH	0.118	-0.075	0.0504	-0.241	0.282	-0.0845	0.219	-0.00368	-0.00697	0.368	-0.13	0.0453
70		GTHC	29d 1	AAF29dL	2.32	2.04	2	-0.258	3.26	1.94	1.8	-0.903	0.638	2.18	1.13	1.2
71				AAF29dM	1.93	1.77	1.58	0.0363	2.91	2.19	1.21	-0.85	0.576	1.85	0.983	1.13
72				AAF29dH	1.53	1.64	1.48	-0.509	2.73	2.41	2.23	-0.517	-0.11	1.8	1.03	0.731
73			29d 2	DEN29dL	0.858	0.516	1.18	0.148	2.48	2.49	0.938	-0.552	-0.342	1.47	0.9	0.383
74				DEN29dM	1.08	1.22	1.79	0.425	3.07	4.79	1.64	-0.574	-0.221	1.94	1.36	0.949
75		NGTHC	29d 1	CLO29dL	-0.0584	-0.0451	-0.125	0.162	0.0291	-0.0926	-0.314	-0.0806	0.119	0.172	-0.0729	0.0519
76				CLO29dM	-0.847	-0.0692	-0.588	-0.0039	0.129	-0.0187	0.416	-0.239	0.024	-0.687	0.214	0.103
77				CLO29dH	-0.324	-0.396	-0.414	-0.193	0.163	-0.399	-0.409	-0.2	-0.0952	-0.975	-0.814	0.313
78			29d 2	ETH29dL	0.318	0.0671	0.233	0.0805	-0.0963	0.942	-0.281	-0.0325	-0.168	0.322	-0.497	-0.211
79				ETH29dM	0.384	0.114	0.108	0.454	-0.288	0.939	0.176	0.145	-0.103	0.409	-0.444	0.0507
80				ETH29dH	0.0622	0.0532	0.207	-0.01	-0.0278	0.424	0.337	0.119	-0.258	0.391	-0.451	0.225
81			29d 3	FEN29dL	0.244	-0.0288	0.014	0.343	0.031	-0.488	-0.295	0.0335	-0.0621	-0.498	-0.364	0.23
82				FEN29dM	-0.614	-0.114	-0.0816	-0.476	-0.0656	-0.851	-0.542	-0.0869	-0.0241	-2.06	-0.321	0.52
83				FEN29dH	-0.586	-0.116	-0.13	-0.653	0.083	-0.844	-0.337	-0.131	-0.113	-2.22	0.12	0.686
84			29d 4	GEM29dL	-0.582	-0.167	-0.211	-0.382	-0.0446	-0.207	-0.246	-0.358	-0.225	-0.353	-0.158	0.27
85				GEM29dM	-0.427	-0.338	-0.197	-0.323	0.0263	0.965	-0.328	-0.184	-0.228	-1	-0.177	0.23
86				GEM29dH	-0.464	-0.0624	-0.349	-0.208	-0.0603	0.355	0.605	-0.363	-0.195	-1.26	-0.185	0.42
87			29d 5	HEX29dL	-0.466	0.208	0.377	-0.0184	0.00109	-0.146	1.15	-0.34	-0.487	-0.502	-0.235	0.374
88				HEX29dM	-0.371	0.31	0.11	0.0963	0.0209	-1.45	1.32	-0.525	-0.178	-1.03	-0.435	0.192
89				HEX29dH	-0.425	0.351	-0.0441	-0.0192	0.203	-0.907	1.83	-0.5	-0.283	-0.937	-0.395	0.22
90			29d 6	PHE29dL	0.261	0.0379	0.121	0.313	-0.0849	0.861	-0.0248	-0.076	0.293	0.163	0.107	0.115
91				PHE29dM	0.0963	0.253	0.139	0.137	-0.116	-0.631	0.573	-0.0125	-0.00876	0.136	0.018	0.191
92				PHE29dH	-0.106	-0.147	0.0019	0.0814	-0.174	-0.291	0.319	-0.0601	-0.328	-0.119	-0.0287	0.22
93			29d 7	WY29dL	-0.557	0.0682	0.597	0.181	0.149	-0.246	-1.14	-0.283	0.444	-1.74	-0.522	0.386
94				WY29dM	-1.19	-0.375	0.409	-0.125	-0.327	-0.389	-1.04	-0.167	0.333	-1.44	-0.552	0.452
95				WY29dH	-1.07	-0.14	0.108	0.264	-0.263	-0.372	-0.463	-0.323	0.572	-2.02	-0.266	0.471
96		NGTNHC	29d 1	AA29dL	-0.286	-0.239	-0.206	0.185	-0.289	-0.103	-0.64	-0.0372	-0.0377	-0.0694	-0.0203	0.0709
97				AA29dM	-0.0347	-0.173	-0.219	-0.0462	0.0211	-1.21	-0.0592	-0.0416	-0.0526	0.0299	0.104	0.163
98				AA29dH	-0.159	-0.261	0.0788	-0.0672	0.175	-0.0842	-0.461	0.0304	0.384	0.124	0.152	0.161
99			29d 2	ASP29dL	-0.0808	0.134	-0.782	0.21	-0.0894	0.0715	0.883	0.0691	-0.41	-0.127	0.186	0.218
100				ASP29dM	-0.131	0.195	-0.853	-0.0489	-0.0144	-0.445	0.43	0.203	-0.362	0.353	0.555	0.485
101				ASP29dH	-0.256	0.157	-1.14	-0.00185	-0.11	-1.35	-0.152	0.223	-0.152	0.156	0.0856	0.752
102			29d 3	CAF29dL	-0.185	-0.108	-0.0461	-0.0989	-0.0213	0.14	-0.00132	-0.12	0.0922	0.3	-0.346	-0.165
103				CAF29dM	0.296	0.134	-0.268	-0.0628	-0.153	0.061	-0.579	-0.122	0.123	0.216	-0.397	0.0734
104				CAF29dH	0.0406	-0.195	-0.656	-0.909	0.15	-0.805	0.0714	-0.167	0.133	-0.91	-0.355	-0.185
105			29d 4	CPA29dL	-0.323	-0.118	-0.0336	0.145	-0.0994	-0.0674	-0.379	-0.154	-0.296	0.528	0.0165	-0.179
106				CPA29dM	-0.148	0.0269	0.321	-0.16	0.189	0.25	-0.198	-0.0542	-0.0854	0.487	0.369	0.01
107				CPA29dH	-0.0164	-0.056	0.451	-0.314	0.00375	1.02	0.185	-0.132	-0.33	-0.263	0.215	-0.169
108			29d 5	CPP29dL	-0.232	-0.0587	-0.334	0.00824	-0.00203	0.857	-0.33	-0.0857	-0.222	0.228	0.448	0.232
109				CPP29dM	-0.00647	-0.136	0.0183	-0.0393	-0.0214	0.995	-1.41	0.0381	0.158	-0.524	0.249	0.0339
110				CPP29dH	0.0227	-0.105	-0.449	-0.666	-0.194	-0.0518	-0.209	-0.00277	-0.26	-0.0381	-0.0111	0.154
111			29d 6	DIA29dL	0.0432	-0.214	-0.131	-0.0478	-0.213	0.374	-0.312	-0.00035	-0.00974	-0.0481	0.146	-0.182
112				DIA29dM	-0.321	-0.224	-0.35	-0.408	0.135	0.988	-0.251	0.13	0.0103	-0.385	-0.111	-0.159
113				DIA29dH	-0.264	-0.383	-0.38	-0.392	0.0204	0.591	-0.64	0.0417	0.148	-1.58	-0.536	-0.389
114			29d 7	IND29dL	-0.0343	0.151	0.0239	-0.379	0.0732	-0.272	0.0703	-0.0684	0.236	0.379	-0.191	0.154
115				IND29dM	0.106	0.135	0.00118	-0.336	-0.0207	0.645	0.14	-0.129	0.185	0.198	-0.0452	0.303
116			29d 8	PBZ29dL	-0.207	-0.111	-0.0903	-0.0427	-0.0704	-0.027	0.0852	-0.14	0.202	-0.00657	0.274	0.0313
117				PBZ29dM	-0.421	-0.0732	-0.496	0.283	-0.0625	-0.479	0.126	-0.267	-0.0686	0.167	0.486	0.0587
118				PBZ29dH	-0.234	-0.233	0.112	0.0675	-0.0529	-0.31	0.469	0.225	-0.118	-0.945	-0.173	-0.0885
119			29d 9	THE29dL	-0.129	0.348	0.199	0.0108	-0.161	-0.492	0.166	0.112	-0.29	-1.05	-0.499	-0.0349
120				THE29dM	0.03	0.212	0.311	-0.225	-0.279	-1.67	-1.05	0.437	-0.0737	-1.32	-0.185	0.0488
121				THE29dH	-0.145	0.394	-0.351	-0.44	-0.0155	-1.48	0.273	0.0925	-0.29	-1.32	-0.107	0.206
122			29d 10	TOL29dL	-0.269	0.204	0.0263	-0.131	0.24	-0.0983	-0.162	0.0133	0.068	-0.237	-0.123	0.164
123				TOL29dM	-0.511	-0.0483	-0.00232	0.266	0.173	-0.485	0.166	0.458	-0.329	-0.284	0.159	0.219
124				TOL29dH	-0.234	-0.0476	0.0827	0.0578	0.463	0.244	-0.277	-0.277	0.0629	-0.162	-0.269	0.16
125	FFPE-	GTHC	28d	AAF-1	2.51	2.44	2.245	-1.13	3.69	0.0293	2.35	-1.8	1.98	2.267	0.879	0.89
126	RNA-Seq			AAF-2	2.42	2.19	2.32	-0.478	3.18	0.29	2.29	-0.909	1.37	2.04	-0.18	0.413
127				AAF-3	2.58	2.29	2.05	0.262	3.75	2.01	2.88	-0.181	2.25	2.33	0.608	1.9
128				AAF-4	2.5	2.98	2.65	0.641	4.56	1.77	1.96	0.513	1.5	2.62	0.0781	2.34
129				AAF-5	2.57	2.72	5.73	-4.45	4.16	1.75	2.72	0.352	2.26	2.53	0.998	1.85
130			28d	CRE-1	0.247	0.505	-0.31	-1.7	0.941	-1.51	0.7	-1.02	0.943	-0.216	-0.316	-0.585
131				CRE-2	-0.0225	0.823	-0.0691	-0.575	1.8	0	1.36	0.28	0	0.107	-0.537	0.987
132				CRE-3	-0.152	0.277	-0.542	-3.05	-0.717	0.192	2.07	-0.051	0	-0.713	-0.316	1.49
133				CRE-4	-1.36	0.796	-0.0717	0.553	1.74	0	1.42	0.434	1.52	-0.592	-0.904	0.377
134				CRE-5	-0.0853	0.352	-0.624	-1.43	1.17	-2.74	1.36	-0.859	-1.27	-0.648	-0.799	-0.367
24hL: 24 h low dose, 24hM: 24 h, middle dose, 24hH: 24 h high dose, 29dL: 29day low dose, 29dM: 29 days middle dose, 29dH: 29 day high dose [https://toxico.nibiohn.go.jp/datalist.html]
