# Supplementary material for: Using FFPE RNA-Seq with 12 marker genes to evaluate genotoxic and non-genotoxic rat hepatocarcinogens
Source: Genes Environ. 2020 Mar 30;42:15. doi: 10.1186/s41021-020-00152-4 (PMC7104499; doi:10.1186/s41021-020-00152-4)
Supplement: Supplementary file 5 — Additional file 5: Appendix 5. PC1 and PC2 of FFPE-AAF, FFPE-CRE and previous Open TG-GATEs results [14]. [file 41021_2020_152_MOESM5_ESM.xlsx]

## Sheet: Appendix 5
Appendix 5 PC1 and PC2 of FFPE-AAF, FFPE-CRE and previous Open TG-GATEs results [14]
No.	Group	Subgroup	Chemical	PC1	PC2
1	Open	GTHC	AAF24hL	-5.496	0.652
2	TG-GATEs		AAF24hM	-5.061	1.424
3	[14]		AAF24hH	-5.235	0.431
4			AFL24hL	-2.551	0.807
5			AFL24hM	-4.911	0.742
6			AFL24hH	-7.255	0.236
7			DEN24hL	-0.637	0.815
8			DEN24hM	-3.268	0.988
9			DEN24hH	-7.351	1.502
10			2NF24hL	-4.591	0.079
11			2NF24hM	-6.181	-0.029
12			2NF24hH	-4.976	-0.418
13			NNM24hL	-5.922	0.409
14			NNM24hM	-8.596	0.328
15			NNM24hH	-9.421	0.272
16		NGTHC	CLO24hL	0.637	0.99
17			CLO24hM	0.563	1.182
18			CLO24hH	0.18	1.867
19			ETH24hL	1.497	-0.049
20			ETH24hM	1.352	0.23
21			ETH24hH	1.001	-0.715
22			FEN24hL	0.628	0.349
23			FEN24hM	-0.159	1.042
24			FEN24hH	-0.382	1.942
25			GEM24hL	0.293	0.543
26			GEM24hM	1.175	0.563
27			GEM24hH	1.076	1.065
28			HEX24hL	0.993	0.36
29			HEX24hM	0.482	0.668
30			HEX24hH	0.862	0.824
31			PHE24hL	0.197	0.944
32			PHE24hM	0.317	0.663
33			PHE24hH	0.495	0.11
34			WY24hL	0.8	0.591
35			WY24hM	0.35	1.181
36			WY24hH	0.29	0.662
37		NGTNHC	AA24hL	1.299	0.165
38			AA24hM	1.612	0.365
39			AA24hH	1.331	0.4
40			ASP24hL	1.321	-0.848
41			ASP24hM	2.152	-0.411
42			ASP24hH	1.258	-0.961
43			CAF24hL	1.64	0.14
44			CAF24hM	1.627	0.701
45			CAF24hH	1.663	-0.094
46			CPA24hL	1.018	0.099
47			CPA24hM	1.652	-0.258
48			CPA24hH	1.563	-0.905
49			CPP24hL	1.091	0.352
50			CPP24hM	1.477	-0.248
51			CPP24hH	2.198	-0.693
52			DEX24hL	1.629	-0.329
53			DEX24hM	1.857	-0.292
54			DEX24hH	1.86	-0.805
55			DIA24hL	0.794	0.114
56			DIA24hM	0.614	0.849
57			DIA24hH	0.522	0.816
58			IND24hL	1.719	0.635
59			IND24hM	1.306	-1.222
60			IND24hH	0.589	-1.607
61			PBZ24hL	0.815	0.369
62			PBZ24hM	0.8	0.549
63			PBZ24hH	0.997	-0.119
64			THE24hL	1.234	1.102
65			THE24hM	1.572	0.697
66			THE24hH	1.566	-0.095
67			TOL24hL	1.608	-0.082
68			TOL24hM	1.344	-0.516
69			TOL24hH	0.95	-0.115
70		GTHC	AAF29dL	-5.227	0.17
71			AAF29dM	-4.344	0.552
72			AAF29dH	-3.792	0.663
73			DEN29dL	-2.113	1.558
74			DEN29dM	-3.996	2.479
75		NGTHC	CLO29dL	1.25	0.227
76			CLO29dM	1.429	0.135
77			CLO29dH	2.128	-0.632
78			ETH29dL	1.284	0.372
79			ETH29dM	1.158	0.81
80			ETH29dH	1.125	0.299
81			FEN29dL	1.565	0.204
82			FEN29dM	2.117	-1.044
83			FEN29dH	1.759	-0.956
84			GEM29dL	1.508	-0.271
85			GEM29dM	1.67	-0.029
86			GEM29dH	1.365	-0.184
87			HEX29dL	0.954	0.145
88			HEX29dM	1.216	-0.527
89			HEX29dH	0.982	-0.398
90			PHE29dL	0.681	0.522
91			PHE29dM	0.864	0.176
92			PHE29dH	1.352	0.424
93			WY29dL	1.696	-0.778
94			WY29dM	2.227	-0.913
95			WY29dH	1.888	-0.682
96		NGTNHC	AA29dL	1.73	0.414
97			AA29dM	1.38	-0.015
98			AA29dH	1.064	-0.108
99			ASP29dL	1.27	0.915
100			ASP29dM	1.026	0.833
101			ASP29dH	1.563	0.279
102			CAF29dL	1.345	-0.128
103			CAF29dM	1.278	-0.13
104			CAF29dH	1.743	-1.414
105			CPA29dL	1.498	0.653
106			CPA29dM	0.761	0.374
107			CPA29dH	0.96	0.323
108			CPP29dL	1.013	0.895
109			CPP29dM	1.437	0.323
110			CPP29dH	1.43	-0.261
111			DIA29dL	1.42	0.325
112			DIA29dM	1.631	-0.097
113			DIA29dH	2.426	-0.747
114			IND29dL	0.85	-0.543
115			IND29dM	0.589	-0.203
116			PBZ29dL	1.012	0.088
117			PBZ29dM	1.176	0.722
118			PBZ29dH	1.845	0.023
119			THE29dL	1.856	-0.181
120			THE29dM	2.282	-0.651
121			THE29dH	1.768	-0.662
122			TOL29dL	1.191	-0.168
123			TOL29dM	1.699	0.744
124			TOL29dH	1.105	-0.013
125	FFPE	GTHC	AAF-1	-6.485	-2.716
126	RNA-Seq		AAF-2	-4.571	-1.877
127			AAF-3	-6.218	-0.758
128			AAF-4	-5.847	0.033
129			AAF-5	-8.195	-5.924
130			CRE-1	0.042	-3.26
131			CRE-2	0.598	-1.924
132			CRE-3	0.018	-3.26
133			CRE-4	2.089	-3.529
134			CRE-5	1.602	-1.703
			24h: 24 hour, 29d: 29days
			L: low, M: middle, H: high
